# Supplementary material for: A unique binding mode of P1′ Leu-containing target sequences for Streptococcus pyogenes sortase A results in alternative cleavage
Source: Royal Society of Chemistry journal article supplement (doi:10.1039/d3cb00129f), 2023-10-18
Supplement: d3cb00129f1.pdf [file d3cb00129f1.pdf]

## Supplementary Information for:

### A unique binding mode of P1' Leu-containing target sequences for *Streptococcus pyogenes* Sortase A results in alternative cleavage

Brandon A. Vogel,<sup>1,†</sup> Jadon M. Blount,<sup>1,†</sup> Hanna M. Kodama,<sup>1,†</sup> Noah J. Goodwin-Rice,<sup>1</sup> Devin J. Andaluz,<sup>1</sup> Sophie N. Jackson,<sup>1</sup> John M. Antos,<sup>1,\*</sup> Jeanine F. Amacher<sup>1,\*</sup>

<sup>1</sup>Department of Chemistry, Western Washington University, Bellingham, WA, 98225

<sup>†</sup>These authors contributed equally to this work.

\*Corresponding Authors:

John Antos

Email: [antosj@wwu.edu](mailto:antosj@wwu.edu)

Jeanine Amacher

Email: [amachej@wwu.edu](mailto:amachej@wwu.edu)

#### This PDF file includes:

Tables S1 to S2 (pp 2-3)  
Figures S1 to S6 (pp 4-9)

#### Table of Contents

|                                                                                                                           |   |
|---------------------------------------------------------------------------------------------------------------------------|---|
| <b>Table S1.</b> LC-ESI-MS characterization of proteins, intact peptide substrates, and Dnp-containing reaction products. | 2 |
| <b>Table S2.</b> Molecular dynamics parameters for all simulations.                                                       | 3 |
| <b>Figure S1.</b> Post-equilibration starting models for MD simulations.                                                  | 4 |
| <b>Figure S2.</b> MD simulation main chain fluctuations over 1000 ns.                                                     | 5 |
| <b>Figure S3.</b> Analysis of transacylation products derived from LPAEL and LPATL substrates.                            | 6 |
| <b>Figure S4.</b> Structural alignments of spySrtA complex structures.                                                    | 7 |
| <b>Figure S5.</b> Structural comparison of all spySrtA-peptide bound structures.                                          | 8 |
| <b>Figure S6.</b> Structural alignment of spySrtA-LPALA and ImSrtA.                                                       | 9 |

**Table S1. LC-ESI-MS characterization of proteins, intact peptide substrates, and Dnp-containing reaction products.**

| <b>Protein<sup>a</sup></b>       | <b>Expected Mass (Da)</b> | <b>Observed Mass (Da)</b> |
|----------------------------------|---------------------------|---------------------------|
| WT spySrtA                       | 20657.4                   | 20657.4                   |
| H143A spySrtA                    | 20591.3                   | 20591.2                   |
| I211P spySrtA                    | 20641.3                   | 20642.1                   |
| spySrtA <sub>monocytogenes</sub> | 20798.6                   | 20798.6                   |
| WT ImSrtA                        | 18070.5                   | 18070.5                   |
| ImSrtA <sub>pyogenes</sub>       | 18810.2                   | 18810.3                   |

| <b>Substrates/Products<sup>b</sup></b> | <b>Expected Mass (m/z)</b> | <b>Observed Mass (m/z)</b> |
|----------------------------------------|----------------------------|----------------------------|
| <b>Abz-LPATGGK(Dnp)</b>                | 927.4                      | 927.4                      |
| GGK(Dnp), standard cleavage product    | 426.2                      | 426.2                      |
| GK(Dnp), alternative cleavage product  | 369.2                      | not observed               |
| <b>Abz-LPATLGK(Dnp)</b>                | 983.5                      | 983.5                      |
| LGK(Dnp)                               | 482.2                      | 482.2                      |
| GK(Dnp)                                | 369.2                      | 369.2                      |
| <b>Abz-LPATYGK(Dnp)</b>                | 1033.5                     | 1033.5                     |
| YGK(Dnp)                               | 532.2                      | 532.2                      |
| GK(Dnp)                                | 369.2                      | 369.2                      |
| <b>Abz-LPAEGGK(Dnp)</b>                | 955.4                      | 955.4                      |
| GGK(Dnp)                               | 426.2                      | 426.2                      |
| GK(Dnp)                                | 369.2                      | 369.2 <sup>c</sup>         |
| <b>Abz-LPAELGK(Dnp)</b>                | 1011.5                     | 1011.5                     |
| LGK(Dnp)                               | 482.2                      | not observed <sup>d</sup>  |
| GK(Dnp)                                | 369.2                      | 369.2                      |

<sup>a</sup>Expected and observed masses for proteins represent average molecular weight (Da). Observed mass values for proteins were determined from deconvolution of protein charge ladders observed in each ESI-MS spectrum. <sup>b</sup>Expected and observed values for peptide substrates and reaction products represent [M+H]<sup>+</sup> ions (monoisotopic). <sup>c</sup>Only trace levels observed by LC-MS in reactions between Abz-LPAEGGK(Dnp) and WT spySrtA. <sup>d</sup>This product was not observed in model reactions employing excess hydroxylamine as the reaction nucleophile. Trace levels were observed in reactions utilizing glycinamide as the reaction nucleophile (see **Fig. S3C**).

**Table S2. Molecular dynamics parameters for all simulations.**

| <b>System</b>          | <b>Number of Atoms</b> | <b>Cubic box dimensions (nm)</b> | <b>Simulation time (ns)</b> |
|------------------------|------------------------|----------------------------------|-----------------------------|
| spySrtA-LPATLA_shifted | 34121                  | 7.019                            | 1000                        |
| spySrtA-LPALA          | 34125                  | 7.019                            | 1000                        |
| spySrtA-LPAEG          | 34128                  | 7.019                            | 1000                        |
| spySrtA-LPAELA         | 40773                  | 7.019                            | 1000                        |

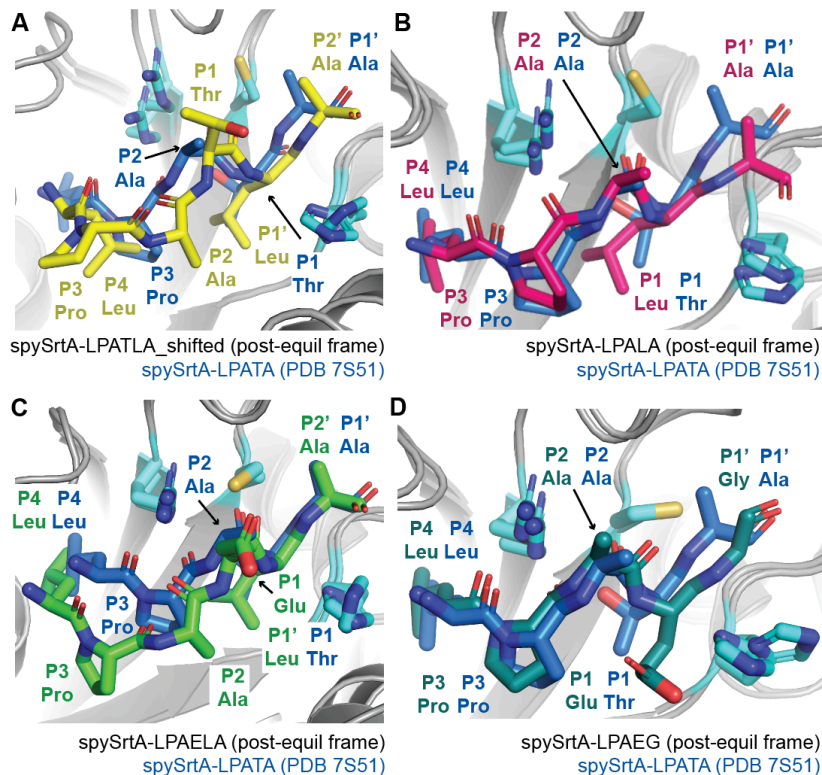

**Figure S1. Post-equilibration starting models for MD simulations.** (A-D) The starting models, post-equilibration, are shown for each of the four MD simulations, spySrtA with: LPATLA\_shifted (A), LPALA (B), LPAELA (C), and LPAEG (D). In all, spySrtA is in gray cartoon, with the catalytic residues shown as side chain sticks and colored by heteroatom (C=cyan, N=blue, S=yellow). The spySrtA-LPATA structure (PDB 7S51) is used to compare (blue sticks, colored by heteroatom), and RMSD values for each main chain alignment are: 0.717 Å over 555 atoms (A), 0.677 Å over 550 atoms (B), 0.837 Å over 563 atoms (C), and 0.866 Å over 571 atoms (D). Peptides are colored as labeled for each, with carbons as: LPATLA\_shifted = yellow (A), LPALA = pink (B), LPAELA = green (C), and LPAEG = teal (D).

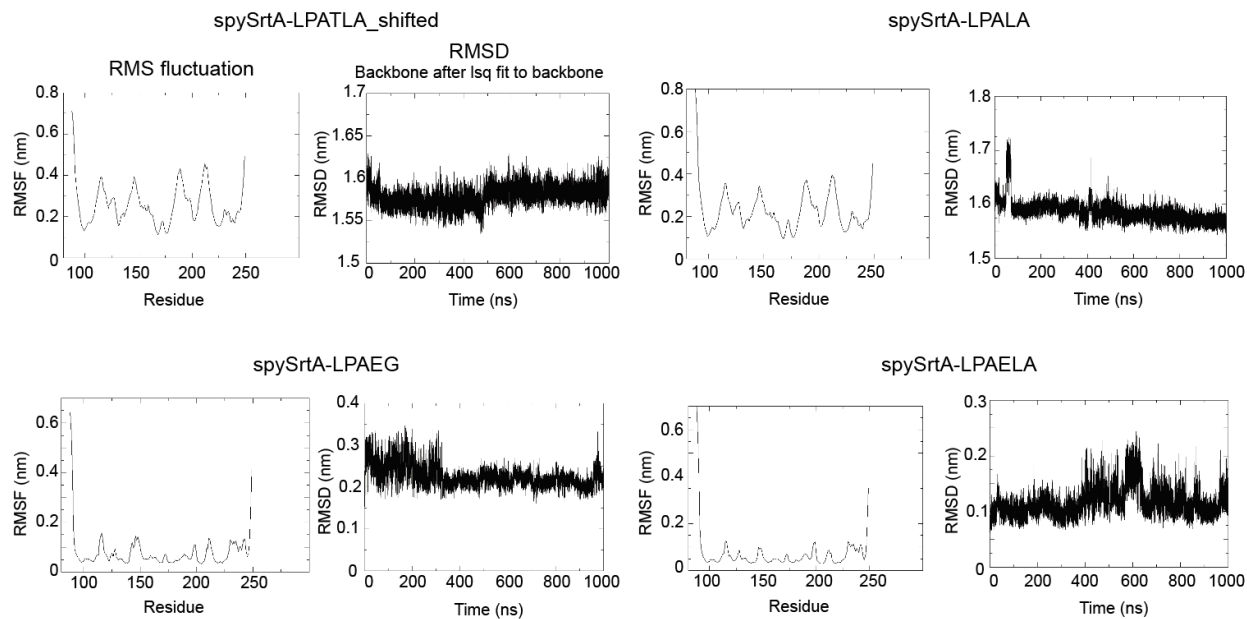

**Figure S2. MD simulation main chain fluctuations over 1000 ns.** The average root-mean-square-fluctuation (RMSF) from the average position for the main-chain sortase atoms over the course of each simulation is graphed for each simulation, as labeled (left-hand graphs). RMSF values are as expected, based on known secondary structure elements and flexible loop regions. The average root-mean-square-deviation (RMSD) for sortase backbone atoms over the course of the simulation is graphed for all four simulations, as labeled.

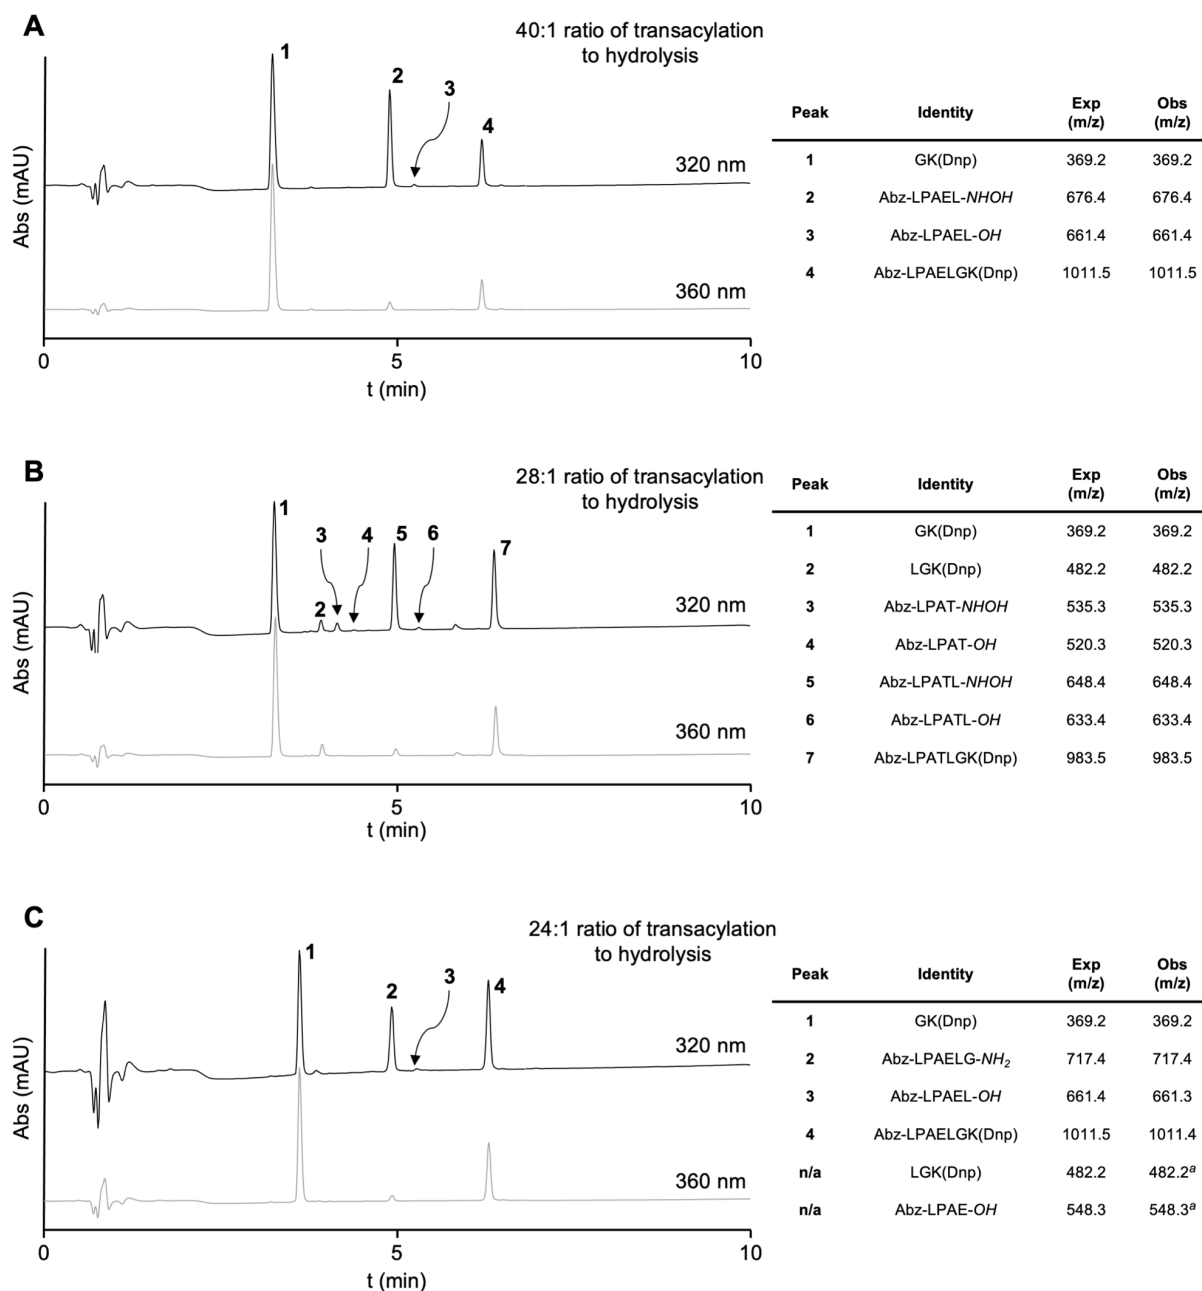

**Figure S3. Analysis of transacylation products derived from LPAEL and LPATL substrates.** Representative RP-HPLC (320/360 nm) chromatograms for the reactions of (A) wild-type spySrtA with Abz-LPAELGK(Dnp) and excess hydroxylamine at 18 h, (B) wild-type spySrtA with Abz-LPATLGK(Dnp) and excess hydroxylamine at 18 h, and (C) wild-type spySrtA with Abz-LPAELGK(Dnp) and excess glycylamide at 24 h. Chromatograms at 320 nm highlight the presence of transacylation/hydrolysis products that only contain the Abz moiety, which otherwise do not absorb strongly at 360 nm. Peak tables are included with each pair of chromatograms, including associated LC-MS data used to confirm the identity of each peak. Expected (exp) and observed (obs) m/z values represent  $[M+H]^+$  ions (monoisotopic). Transacylation products for panels A and B contain C-terminal hydroxamides (indicated as *-NHOH*). The transacylation product for panel C contains a C-terminal primary amide (*-NH<sub>2</sub>*) arising from the glycylamide nucleophile. Hydrolysis products are indicated with *-OH* to signify the C-terminal carboxylic acid. <sup>a</sup>Trace levels of species arising from cleavage at the P1/P1' site were observed by LC-MS, but were otherwise undetectable in the UV chromatograms.

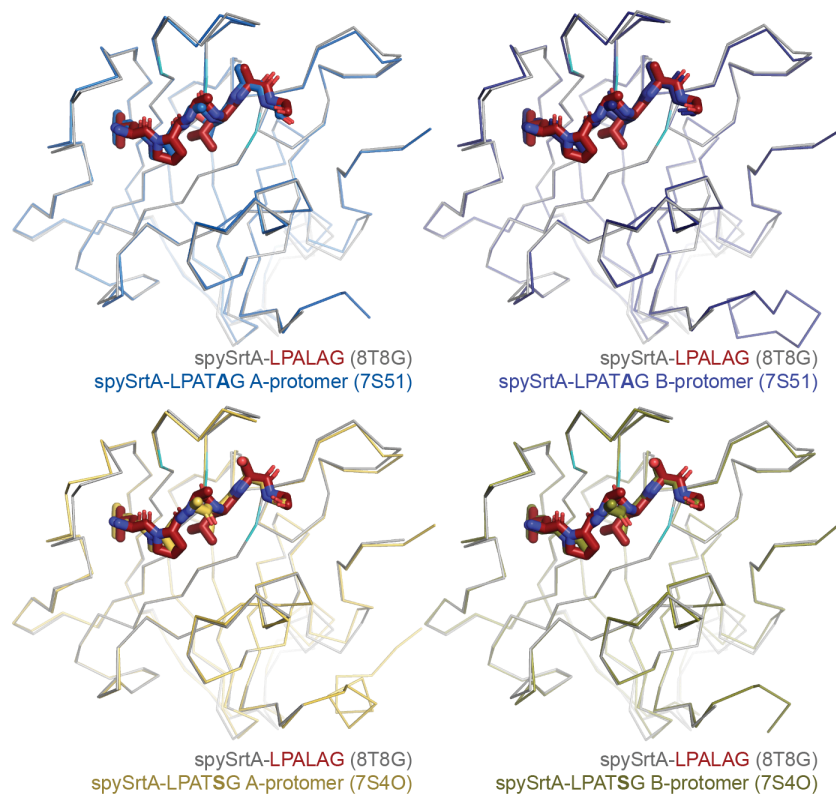

**Figure S4. Structural alignments of spySrtA complex structures.** For all, the spySrtA protein is shown in ribbon/C $\alpha$  trace representation. The LPALAG peptide is in dark red sticks and colored by heteroatom (N=blue, O=red). The A- and B-protomers of the spySrtA-LPATAG (PDB 7S51, below as 7S51-A and 7S51-B) and spySrtA-LPATSG (PDB 7S40, below as 7S40-A and 7S40-B) are colored as labeled, with peptides as sticks. Alignment RMSD values for main chain atoms are: 7S51-A = 0.194 Å over 484 atoms, 7S51-B = 0.180 Å over 470 atoms, 7S40-A = 0.174 Å over 472 atoms, and 7S40-B = 0.192 Å over 490 atoms.

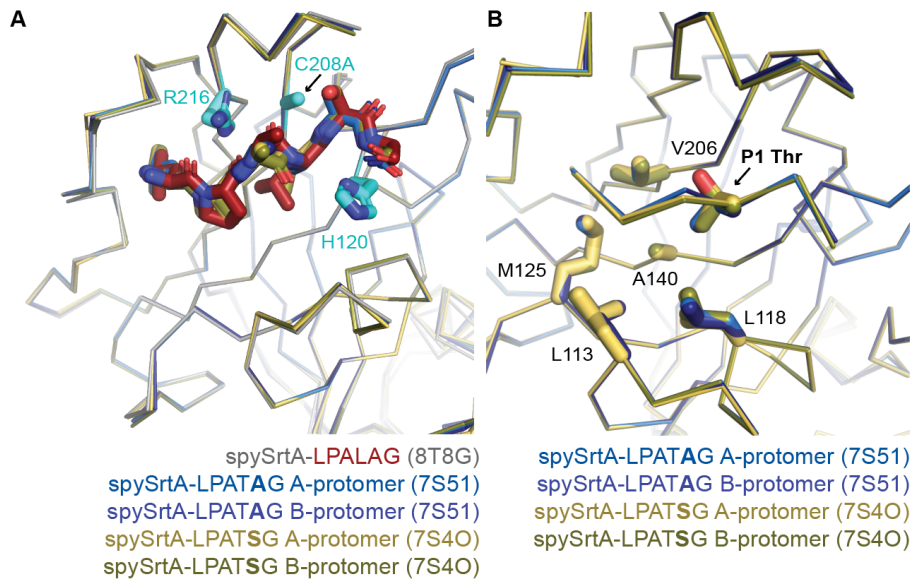

**Figure S5. Structural comparison of all spySrtA-peptide bound structures.** (A) Structural alignment of all spySrtA-peptide bound protomers (PDBs 7S51, 7S4O, and 8T8G from this work). The spySrtA backbone is in ribbon/C $\alpha$  trace representation, and colored as labeled. Peptides are shown as sticks and colored by heteroatom (C=as labeled, N=blue, O=red). The catalytic triad side chain atoms are in cyan sticks and colored by heteroatom. (B) A conserved hydrophobic binding pocket for the P1 position (here, Thr) is shown for the spySrtA-LPATA (PDB 7S51) and spySrtA-LPATS (PDB 7S4O) structures. Rendering is as in (A), which relevant side chain sticks shown and labeled.



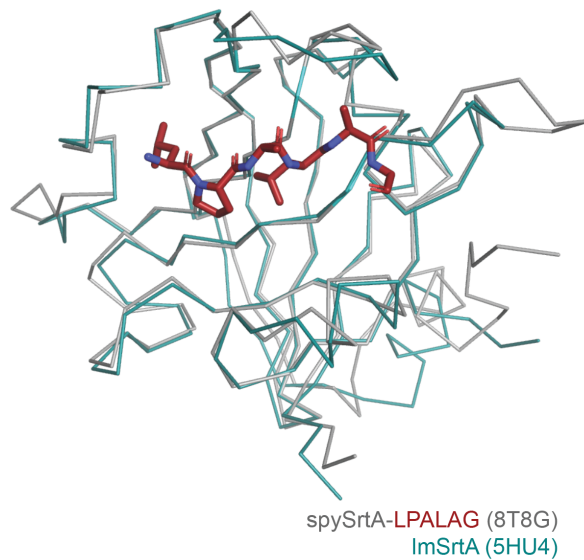

**Figure S6. Structural alignment of spySrtA-LPALA and ImSrtA.** The spySrtA (gray) and ImSrtA (teal, PDB 5HU4) proteins are shown in ribbon/C $\alpha$  trace representation. The LPALAG peptide is in dark red sticks, colored by heteroatom (N=blue, O=red). The spySrtA and ImSrtA main chain atoms aligned with an overall RMSD of 0.494 Å over 397 atoms.
